# Supplementary material
Source: publisher figshare collection journal article supplement (https://acs.figshare.com/ndownloader/files/5844888)
Supplement: Supplementary file 1 [file 5844888]

## Sheet: Supplementary_Table_3
Vandenbrouck et al., "Looking for missing proteins in the proteome of human spermatozoa: an update"
Supplementary Table 3: Missing (PE2-4) and uncertain (PE5) proteins detected in the sperm proteome: detailed information.
Entry	Data mined	Gene names	accession	description	MW	Length	coverage (in %)	Entry	no. of unique peptide	Whole Lysate 1D gel	Whole Lysate Long runs	High pH Reverse phase	Soluble fraction	Insoluble fraction	chromosome	neXtProt PE level	No. of TMH	Subcellular location [CC]	Function [CC]	HTGEP (Chalmel et al., 2012)	« testis-enriched gene » status in the Human Protein Atlas version 15
A0AVI2	Yes	FER1L5	sp|A0AVI2|FR1L5_HUMAN	Fer-1-like protein 5 OS=Homo sapiens GN=FER1L5 PE=2 SV=2	241962	2093	0.53	A0AVI2	1	No	No	No	No	Yes	2q11.2	Evidence at transcript level	1	Cell membrane {ECO:0000250}. Membrane {ECO:0000305}; Single-pass membrane protein {ECO:0000305}. Note=Colocalizes with EHD1 and EHD2 at plasma membrane in myoblasts and myotubes. Localizes into foci at the plasma membrane (By similarity). {ECO:0000250}.	FUNCTION: Plays a role in myoblast fusion; probable mediator of endocytic recycling for membrane trafficking events during myotube formation. {ECO:0000250}.	SET
A1A4V9	No	CCDC189 C16orf93	sp|A1A4V9|CP093_HUMAN	Coiled-coil domain-containing protein C16orf93 OS=Homo sapiens GN=C16orf93 PE=2 SV=1	37921	331	40.79	A1A4V9	10	Yes	Yes	Yes	Yes	Yes	16p11.2	Evidence at transcript level	0
A1L453	Yes	PRSS38 MPN2	sp|A1L453|PRS38_HUMAN	Serine protease 38 OS=Homo sapiens GN=PRSS38 PE=2 SV=2	35356	326	7.36	A1L453	2	No	No	Yes	No	Yes	1q42.13	Evidence at transcript level	0	Secreted {ECO:0000305}.
A2RUU4	Yes	CLPSL1 C6orf127	sp|A2RUU4|COLL1_HUMAN	Colipase-like protein 1 OS=Homo sapiens GN=CLPSL1 PE=2 SV=1	14056	121	20.66	A2RUU4	2	Yes	Yes	Yes	Yes	Yes	6p21.31	Evidence at transcript level	0	Secreted {ECO:0000255|PROSITE-ProRule:PRU00674}.
A4D1F6	No	LRRD1	sp|A4D1F6|LRRD1_HUMAN	Leucine-rich repeat and death domain-containing protein 1 OS=Homo sapiens GN=LRRD1 PE=2 SV=2	98035	860	20.81	A4D1F6	13	Yes	Yes	No	Yes	Yes	7q21.2	Evidence at transcript level	0				Yes
A4D256	Yes	CDC14C CDC14B2	sp|A4D256|CC14C_HUMAN	Dual specificity protein phosphatase CDC14C OS=Homo sapiens GN=CDC14C PE=2 SV=2	63299	554	2.35	A4D256	1	No	No	No	No	Yes	7p12.3	Evidence at transcript level	1	Membrane {ECO:0000305}; Single-pass membrane protein {ECO:0000305}. Nucleus, nucleolus. Note=Nucleolar during interphase. {ECO:0000250}.	FUNCTION: Dual-specificity phosphatase. Preferentially dephosphorylates proteins modified by proline-directed kinases (By similarity). {ECO:0000250}.
A4QMS7	Yes	C5orf49	sp|A4QMS7|CE049_HUMAN	Uncharacterized protein C5orf49 OS=Homo sapiens GN=C5orf49 PE=2 SV=1	16990	147	42.18	A4QMS7	5	Yes	Yes	No	Yes	Yes	5p15.31	Evidence at transcript level	0			PET
A5D8W1	No	CFAP69 C7orf63	sp|A5D8W1|CFA69_HUMAN	Cilia- and flagella-associated protein 69 OS=Homo sapiens GN=CFAP69 PE=2 SV=3	105883	941	34.54	A5D8W1	25	Yes	Yes	Yes	Yes	Yes	7q21.13	Evidence at transcript level	0			UE
A5PLK6	No	RGSL1 RGSL RGSL2	sp|A5PLK6|RGSL_HUMAN	Regulator of G-protein signaling protein-like OS=Homo sapiens GN=RGSL1 PE=2 SV=1	125688	1076	6.6	A5PLK6	5	No	No	Yes	Yes	Yes	1q25.3	Evidence at transcript level	1	Membrane {ECO:0000305}; Single-pass membrane protein {ECO:0000305}.			Yes
A6H8Z2	Yes	FAM221B C9orf128	sp|A6H8Z2|F221B_HUMAN	Protein FAM221B OS=Homo sapiens GN=FAM221B PE=2 SV=2	45394	402	19.9	A6H8Z2	7	Yes	Yes	No	No	Yes	9p13.3	Evidence at transcript level	0			SET
A6NCJ1	No	C19orf71	sp|A6NCJ1|CS071_HUMAN	Uncharacterized protein C19orf71 OS=Homo sapiens GN=C19orf71 PE=4 SV=2	24176	209	76.08	A6NCJ1	10	Yes	Yes	Yes	No	Yes	19p13.3	Predicted	0
A6NCL2	No	LRCOL1	sp|A6NCL2|LRCL1_HUMAN	Leucine-rich colipase-like protein 1 OS=Homo sapiens GN=LRCOL1 PE=2 SV=3	17833	159	19.5	A6NCL2	2	Yes	No	No	Yes	No	12q24.33	Evidence at transcript level	0
A6NCM1	No	IQCA1L IQCA1P1	sp|A6NCM1|IQCAL_HUMAN	IQ and AAA domain-containing protein 1-like OS=Homo sapiens GN=IQCA1L PE=3 SV=2	94931	817	4.77	A6NCM1	2	No	No	No	No	Yes	7q36.1	Inferred from homology	0
A6NCN8	No		sp|A6NCN8|YL021_HUMAN	Uncharacterized protein ENSP00000372125 OS=Homo sapiens PE=4 SV=2	35333	305	16.39	A6NCN8	3	Yes	No	No	No	Yes	12p13.33	Predicted	0
A6NE01	No	FAM186A	sp|A6NE01|F186A_HUMAN	Protein FAM186A OS=Homo sapiens GN=FAM186A PE=2 SV=3	262758	2351	4.64	A6NE01	6	No	No	No	Yes	No	12q13.12	Evidence at transcript level	0
A6NE52	Yes	WDR97 KIAA1875	sp|A6NE52|K1875_HUMAN	WD repeat-containing protein KIAA1875 OS=Homo sapiens GN=KIAA1875 PE=2 SV=2	180306	1622	9.12	A6NE52	11	No	No	Yes	No	Yes	8q24.3	Evidence at transcript level	0
A6NEN9	Yes	CXorf65	sp|A6NEN9|CX065_HUMAN	Uncharacterized protein CXorf65 OS=Homo sapiens GN=CXorf65 PE=4 SV=1	21305	183	36.61	A6NEN9	4	Yes	Yes	Yes	No	Yes	Xq13.1	Predicted	0			PET
A6NF34	No	ANTXRL	sp|A6NF34|ANTRL_HUMAN	Anthrax toxin receptor-like OS=Homo sapiens GN=ANTXRL PE=3 SV=3	70628	631	19.65	A6NF34	8	No	Yes	Yes	No	Yes	10q11.22	Inferred from homology	1	Membrane {ECO:0000305}; Single-pass type I membrane protein {ECO:0000305}.
A6NFU0	No	FAM187A	sp|A6NFU0|F187A_HUMAN	Ig-like V-type domain-containing protein FAM187A OS=Homo sapiens GN=FAM187A PE=3 SV=1	47349	413	11.62	A6NFU0	4	No	No	Yes	No	Yes	17q21.31	Inferred from homology	1	Membrane {ECO:0000305}; Single-pass type I membrane protein {ECO:0000305}.
A6NFZ4	Yes	FAM24A	sp|A6NFZ4|FA24A_HUMAN	Protein FAM24A OS=Homo sapiens GN=FAM24A PE=3 SV=1	11258	105	41.9	A6NFZ4	4	No	Yes	Yes	No	No	10q26.13	Inferred from homology	0	Secreted {ECO:0000305}.		SET	Yes
A6NGB0	No	TMEM191C	sp|A6NGB0|T191C_HUMAN	Transmembrane protein 191C OS=Homo sapiens GN=TMEM191C PE=3 SV=2	39291	347	40.06	A6NGB0	1	Yes	Yes	Yes	Yes	Yes	22q11.21	Inferred from homology	1	Membrane {ECO:0000255}; Single-pass membrane protein {ECO:0000255}.
A6NGY3	No	C5orf52	sp|A6NGY3|CE052_HUMAN	Uncharacterized protein C5orf52 OS=Homo sapiens GN=C5orf52 PE=2 SV=2	17908	159	18.87	A6NGY3	2	Yes	No	Yes	No	No	5q33.3	Evidence at transcript level	0
A6NI87	Yes	CBY3	sp|A6NI87|CBY3_HUMAN	Protein chibby homolog 3 OS=Homo sapiens GN=CBY3 PE=3 SV=3	27343	242	16.12	A6NI87	3	Yes	Yes	No	No	Yes	5q35.3	Inferred from homology	0			SET
A6NIV6	No	LRRIQ4 LRRC64	sp|A6NIV6|LRIQ4_HUMAN	Leucine-rich repeat and IQ domain-containing protein 4 OS=Homo sapiens GN=LRRIQ4 PE=3 SV=2	63976	560	40.71	A6NIV6	14	Yes	Yes	Yes	No	Yes	3q26.2	Inferred from homology	0
A6NJI9	No	LRRC72	sp|A6NJI9|LRC72_HUMAN	Leucine-rich repeat-containing protein 72 OS=Homo sapiens GN=LRRC72 PE=2 SV=2	33655	287	17.77	A6NJI9	5	Yes	No	Yes	No	Yes	7p21.1	Evidence at transcript level	0
A6NLX4	No	TMEM210	sp|A6NLX4|TM210_HUMAN	Transmembrane protein 210 OS=Homo sapiens GN=TMEM210 PE=3 SV=1	15516	147	20.41	A6NLX4	1	No	No	No	Yes	No	9q34.3	Inferred from homology	1	Membrane {ECO:0000305}; Single-pass type I membrane protein {ECO:0000305}.
A6NM11	No	LRRC37A2	sp|A6NM11|L37A2_HUMAN	Leucine-rich repeat-containing protein 37A2 OS=Homo sapiens GN=LRRC37A2 PE=2 SV=2	188392	1700	37.35	A6NM11	3	Yes	Yes	Yes	Yes	No	17q21.31	Evidence at transcript level	1	Membrane {ECO:0000305}; Single-pass type I membrane protein {ECO:0000305}.
A6NMS7	No	LRRC37A LRRC37A1	sp|A6NMS7|L37A1_HUMAN	Leucine-rich repeat-containing protein 37A OS=Homo sapiens GN=LRRC37A PE=2 SV=3	188258	1700	35.41	A6NMS7	2	Yes	Yes	No	Yes	Yes	17q21.31	Evidence at transcript level	1	Membrane {ECO:0000305}; Single-pass type I membrane protein {ECO:0000305}.
A6NN90	Yes	C2orf81	sp|A6NN90|CB081_HUMAN	Uncharacterized protein C2orf81 OS=Homo sapiens GN=C2orf81 PE=3 SV=2	63053	581	22.72	A6NN90	9	Yes	No	Yes	Yes	Yes	2p13.1	Inferred from homology	0			SET
A6NNE9	No	MARCH11	sp|A6NNE9|MARHB_HUMAN	E3 ubiquitin-protein ligase MARCH11 OS=Homo sapiens GN=MARCH11 PE=2 SV=3	43877	402	2.49	A6NNE9	1	No	No	No	Yes	No	5p15.1	Evidence at transcript level	2	Cytoplasmic vesicle membrane {ECO:0000250}; Multi-pass membrane protein {ECO:0000250}.	FUNCTION: E3 ubiquitin-protein ligase that mediates polyubiquitination of CD4. E3 ubiquitin ligases accept ubiquitin from an E2 ubiquitin-conjugating enzyme in the form of a thioester and then directly transfer the ubiquitin to targeted substrates. May play a role in ubuquitin-dependent protein sorting in developmenting spermatids (By similarity). {ECO:0000250}.	PET
A6NNW6	No	ENO4 C10orf134	sp|A6NNW6|ENO4_HUMAN	Enolase-like protein ENO4 OS=Homo sapiens GN=ENO4 PE=2 SV=2	68821	628	18.79	A6NNW6	8	Yes	Yes	No	No	Yes	10q25.3	Evidence at transcript level	0		FUNCTION: May be required for sperm motility and function. {ECO:0000250|UniProtKB:Q8C042}.
A6NNX1	No	RIIAD1 C1orf230	sp|A6NNX1|RIAD1_HUMAN	RIIa domain-containing protein 1 OS=Homo sapiens GN=RIIAD1 PE=4 SV=1	10809	92	33.7	A6NNX1	3	No	Yes	No	No	Yes	1q21.3	Predicted	0			UE
A7E2U8	Yes	C4orf47 Chr4_1746	sp|A7E2U8|CD047_HUMAN	UPF0602 protein C4orf47 OS=Homo sapiens GN=C4orf47 PE=2 SV=1	34376	309	56.31	A7E2U8	12	Yes	Yes	No	Yes	Yes	4q35.1	Evidence at transcript level	0	Cytoplasm, cytoskeleton, microtubule organizing center, centrosome {ECO:0000269|PubMed:25074808}.		PET
A8MTL0	No	IQCF5	sp|A8MTL0|IQCF5_HUMAN	IQ domain-containing protein F5 OS=Homo sapiens GN=IQCF5 PE=2 SV=2	18048	148	30.41	A8MTL0	3	Yes	Yes	Yes	No	Yes	3p21.2	Evidence at transcript level	0			SET	Yes
A8MTZ7	No	C12orf71	sp|A8MTZ7|CL071_HUMAN	Uncharacterized protein C12orf71 OS=Homo sapiens GN=C12orf71 PE=4 SV=3	30354	269	12.27	A8MTZ7	2	Yes	No	No	Yes	No	12p11.23	Predicted	0
A8MV24	Yes	C17orf98	sp|A8MV24|CQ098_HUMAN	Uncharacterized protein C17orf98 OS=Homo sapiens GN=C17orf98 PE=4 SV=1	17564	154	48.7	A8MV24	5	Yes	Yes	No	No	Yes	17q12	Predicted	0				Yes
A8MYZ5	No	IQCF6	sp|A8MYZ5|IQCF6_HUMAN	IQ domain-containing protein F6 OS=Homo sapiens GN=IQCF6 PE=3 SV=3	13059	107	37.38	A8MYZ5	5	No	No	Yes	No	Yes	3p21.2	Inferred from homology	0			SET	Yes
A8MZ26	No	EFCAB9	sp|A8MZ26|EFCB9_HUMAN	EF-hand calcium-binding domain-containing protein 9 OS=Homo sapiens GN=EFCAB9 PE=3 SV=2	23936	197	26.4	A8MZ26	5	Yes	No	No	No	Yes	5q35.1	Inferred from homology	0				Yes
B1AJZ9	Yes	FHAD1 KIAA1937	sp|B1AJZ9|FHAD1_HUMAN	Forkhead-associated domain-containing protein 1 OS=Homo sapiens GN=FHAD1 PE=2 SV=2	161903	1412	2.2	B1AJZ9	2	Yes	No	Yes	No	No	1p36.21	Evidence at transcript level	0
B1ANS9	Yes	WDR64	sp|B1ANS9|WDR64_HUMAN	WD repeat-containing protein 64 OS=Homo sapiens GN=WDR64 PE=2 SV=1	123631	1081	36.36	B1ANS9	35	Yes	Yes	No	Yes	Yes	1q43	Evidence at transcript level	0			SET
B2RC85	No	RSPH10B2	sp|B2RC85|R10B2_HUMAN	Radial spoke head 10 homolog B2 OS=Homo sapiens GN=RSPH10B2 PE=2 SV=2	100546	870	21.03	B2RC85	1	Yes	No	No	No	Yes	7p22.1	Evidence at transcript level	0			PET
B2RV13	Yes	C17orf105	sp|B2RV13|CQ105_HUMAN	Uncharacterized protein C17orf105 OS=Homo sapiens GN=C17orf105 PE=2 SV=1	19546	164	26.22	B2RV13	4	Yes	Yes	Yes	No	Yes	17q21.31	Evidence at transcript level	0			SET	Yes
B4DYI2	No	SPATA31C2 FAM75C2	sp|B4DYI2|S31C2_HUMAN	Spermatogenesis-associated protein 31C2 OS=Homo sapiens GN=SPATA31C2 PE=2 SV=2	124429	1134	40.65	B4DYI2	7	Yes	Yes	Yes	No	Yes	9q22.1	Evidence at transcript level	1	Membrane {ECO:0000305}; Single-pass membrane protein {ECO:0000305}.	FUNCTION: May play a role in spermatogenesis. {ECO:0000250}.
C9J6K1	Yes	C19orf81	sp|C9J6K1|CS081_HUMAN	Putative uncharacterized protein C19orf81 OS=Homo sapiens GN=C19orf81 PE=4 SV=1	22443	198	5.56	C9J6K1	1	No	No	No	No	Yes	19q13.33	Predicted	0
D6REC4	Yes	CFAP99	sp|D6REC4|CFA99_HUMAN	Cilia- and flagella-associated protein 99 OS=Homo sapiens GN=CFAP99 PE=3 SV=1	52292	459	4.79	D6REC4	1	No	No	No	No	Yes	4p16.3	Inferred from homology	0	Cell projection, cilium, flagellum {ECO:0000250|UniProtKB:A8IUG5}.		PET
H3BNL8	No	C6orf229	sp|H3BNL8|CF229_HUMAN	Uncharacterized protein C6orf229 OS=Homo sapiens GN=C6orf229 PE=4 SV=1	26547	230	25.65	H3BNL8	5	No	No	No	No	Yes	6p22.3	Predicted	0
H3BTG2-2	Yes	C1orf234	sp|H3BTG2-2|CA234_HUMAN	Isoform 2 of Uncharacterized protein C1orf234 OS=Homo sapiens GN=C1orf234	15847	121	35.07	H3BTG2-2	4	Yes	Yes	Yes	No	Yes	1p36.12	Evidence at transcript level	0			SET
O95214	Yes	LEPROTL1 My047 UNQ577/PRO1139	sp|O95214|LERL1_HUMAN	Leptin receptor overlapping transcript-like 1 OS=Homo sapiens GN=LEPROTL1 PE=2 SV=2	14428	131	9.92	O95214	1	No	Yes	No	No	Yes	8p12	Evidence at transcript level	4	Membrane {ECO:0000305}; Multi-pass membrane protein {ECO:0000305}.	FUNCTION: Negatively regulates growth hormone (GH) receptor cell surface expression in liver. May play a role in liver resistance to GH during periods of reduced nutrient availability. {ECO:0000269|PubMed:19907080}.
O95473	No	SYNGR4	sp|O95473|SNG4_HUMAN	Synaptogyrin-4 OS=Homo sapiens GN=SYNGR4 PE=2 SV=2	25820	234	70.94	O95473	9	Yes	Yes	Yes	Yes	Yes	19q13.33	Evidence at transcript level	4	Membrane; Multi-pass membrane protein.		PET	Yes
P0C221	No	CCDC175 C14orf38	sp|P0C221|CC175_HUMAN	Coiled-coil domain-containing protein 175 OS=Homo sapiens GN=CCDC175 PE=4 SV=2	93625	793	20.05	P0C221	13	Yes	No	No	No	Yes	14q23.1	Predicted	0
P0C5Z0	No	H2AFB2; H2AFB3 H2ABBD H2AFB	sp|P0C5Z0|H2AB2_HUMAN	Histone H2A-Bbd type 2/3 OS=Homo sapiens GN=H2AFB2 PE=2 SV=1	12713	115	61.74	P0C5Z0	1	Yes	Yes	Yes	No	Yes	Xq28	Evidence at transcript level	0	Nucleus {ECO:0000269|PubMed:20008104}. Chromosome {ECO:0000269|PubMed:20008104, ECO:0000269|PubMed:22795134}. Note=Associated with the active X chromosome and with autosomes, while it is absent from the inactive X chromosome and excluded from Barr bodies. {ECO:0000269|PubMed:20008104}.	FUNCTION: Atypical histone H2A which can replace conventional H2A in some nucleosomes and is associated with active transcription and mRNA processing. Nucleosomes wrap and compact DNA into chromatin, limiting DNA accessibility to the cellular machineries which require DNA as a template. Histones thereby play a central role in transcription regulation, DNA repair, DNA replication and chromosomal s…
P0C7A2	Yes	FAM153B	sp|P0C7A2|F153B_HUMAN	Protein FAM153B OS=Homo sapiens GN=FAM153B PE=2 SV=1	43590	387	10.08	P0C7A2	1	No	No	Yes	Yes	Yes	5q35.2	Evidence at transcript level	0			SET
P0C7I6	No	CCDC159	sp|P0C7I6|CC159_HUMAN	Coiled-coil domain-containing protein 159 OS=Homo sapiens GN=CCDC159	33695	412	41.41	P0C7I6	9	Yes	Yes	Yes	No	No	19p13.2	Evidence at transcript level	0
P0C7M6	No	IQCF3	sp|P0C7M6|IQCF3_HUMAN	IQ domain-containing protein F3 OS=Homo sapiens GN=IQCF3 PE=2 SV=1	18250	154	30.52	P0C7M6	5	No	Yes	Yes	No	No	3p21.2	Evidence at transcript level	0			SET	Yes
P0C7X4	No	FTH1P19 FTHL19	sp|P0C7X4|FHL19_HUMAN	Putative ferritin heavy polypeptide-like 19 OS=Homo sapiens GN=FTH1P19 PE=5 SV=1	22644	201	7.46	P0C7X4	1	Yes	No	Yes	No	No	Xp21.1	Uncertain	0
P0C874	No	SPATA31D3 FAM75D3	sp|P0C874|S31D3_HUMAN	Putative spermatogenesis-associated protein 31D3 OS=Homo sapiens GN=SPATA31D3 PE=5 SV=1	102418	917	52.24	P0C874	2	Yes	Yes	Yes	Yes	Yes	9q21.32	Uncertain	1	Membrane {ECO:0000305}; Single-pass membrane protein {ECO:0000305}.	FUNCTION: May play a role in spermatogenesis. {ECO:0000250}.
P0C875	Yes	FAM228B	sp|P0C875|F228B_HUMAN	Protein FAM228B OS=Homo sapiens GN=FAM228B PE=2 SV=1	37405	321	22.12	P0C875	6	Yes	No	No	No	Yes	2p23.3	Evidence at transcript level	0
P0C881	Yes	RSPH10B	sp|P0C881|R10B1_HUMAN	Radial spoke head 10 homolog B OS=Homo sapiens GN=RSPH10B PE=2 SV=1	100634	870	21.03	P0C881	1	No	No	No	No	Yes	7p22.1	Evidence at transcript level	0			PET
P0C8F1	No	PATE4	sp|P0C8F1|PATE4_HUMAN	Prostate and testis expressed protein 4 OS=Homo sapiens GN=PATE4 PE=2 SV=2	11407	98	55.1	P0C8F1	8	Yes	Yes	Yes	Yes	Yes	11q24.2	Evidence at transcript level	0	Secreted {ECO:0000250}. Cytoplasmic vesicle, secretory vesicle, acrosome {ECO:0000269|PubMed:18387948}.	FUNCTION: May modulate the function of nicotinic acetylcholine receptors. May enhance sperm motility. {ECO:0000269|PubMed:18387948}.
P0CW27	No	CCDC166	sp|P0CW27|CC166_HUMAN	Coiled-coil domain-containing protein 166 OS=Homo sapiens GN=CCDC166 PE=4 SV=1	48709	439	18.45	P0CW27	6	Yes	No	No	No	Yes	8q24.3	Predicted	0
P0DJG4	No	THEGL	sp|P0DJG4|THEGL_HUMAN	Testicular haploid expressed gene protein-like OS=Homo sapiens GN=THEGL PE=2 SV=1	53028	465	28.17	P0DJG4	10	Yes	No	Yes	No	Yes	4q12	Evidence at transcript level	0
P0DKV0	No	SPATA31C1 FAM75C1	sp|P0DKV0|S31C1_HUMAN	Spermatogenesis-associated protein 31C1 OS=Homo sapiens GN=SPATA31C1 PE=2 SV=1	130522	1188	35.69	P0DKV0	7	Yes	Yes	Yes	No	No	9q22.1	Evidence at transcript level	1	Membrane {ECO:0000305}; Single-pass membrane protein {ECO:0000305}.	FUNCTION: May play a role in spermatogenesis. {ECO:0000250}.
P49223	No	SPINT3	sp|P49223|SPIT3_HUMAN	Kunitz-type protease inhibitor 3 OS=Homo sapiens GN=SPINT3 PE=3 SV=3	10251	89	29.21	P49223	3	Yes	Yes	Yes	Yes	Yes	20q13.12	Inferred from homology	0	Secreted {ECO:0000305}.
Q08648-4	No	SPAG11B EP2 HE2	sp|Q08648-4|SG11B_HUMAN	Isoform EP2D of Sperm-associated antigen 11B OS=Homo sapiens GN=SPAG11B	14850		16.54	Q08648-4	3	Yes	No	Yes	Yes	Yes	8p23.1	Evidence at transcript level	0
Q0P670	Yes	C17orf74	sp|Q0P670|CQ074_HUMAN	Uncharacterized protein C17orf74 OS=Homo sapiens GN=C17orf74 PE=2 SV=2	57131	501	43.91	Q0P670	13	Yes	Yes	Yes	Yes	No	17p13.1	Evidence at transcript level	1	Membrane {ECO:0000305}; Single-pass membrane protein {ECO:0000305}.		SET	Yes
Q0VAA2	Yes	LRRC74A C14orf166B LRRC74	sp|Q0VAA2|LR74A_HUMAN	Leucine-rich repeat-containing protein 74A OS=Homo sapiens GN=LRRC74A PE=2 SV=2	54534	488	51.64	Q0VAA2	18	Yes	Yes	Yes	No	Yes	14q24.3	Evidence at transcript level	0			SET
Q14409	No	GK3P GKP3 GKTB	sp|Q14409|GLPK3_HUMAN	Putative glycerol kinase 3 OS=Homo sapiens GN=GK3P PE=5 SV=2	60597	553	79.75	Q14409	4	Yes	Yes	Yes	Yes	Yes	4q32.3	Uncertain	0	Mitochondrion outer membrane {ECO:0000250}; Peripheral membrane protein {ECO:0000250}; Cytoplasmic side {ECO:0000250}. Cytoplasm {ECO:0000250}. Note=In sperm the majority of the enzyme is bound to mitochondria. {ECO:0000250}.	FUNCTION: Key enzyme in the regulation of glycerol uptake and metabolism.	PET
Q14507	No	EDDM3A FAM12A HE3A	sp|Q14507|EP3A_HUMAN	Epididymal secretory protein E3-alpha OS=Homo sapiens GN=EDDM3A PE=2 SV=2	17646	147	30.61	Q14507	3	No	No	No	Yes	Yes	14q11.2	Evidence at transcript level	0	Secreted {ECO:0000305}.	FUNCTION: Possible function in sperm maturation.
Q17R55	Yes	FAM187B TMEM162	sp|Q17R55|F187B_HUMAN	Protein FAM187B OS=Homo sapiens GN=FAM187B PE=2 SV=2	42386	369	18.7	Q17R55	6	Yes	No	No	Yes	Yes	19q13.12	Evidence at transcript level	1	Membrane {ECO:0000305}; Single-pass type I membrane protein {ECO:0000305}.		SET	Yes
Q2TAA8	No	TSNAXIP1 TXI1	sp|Q2TAA8|TXIP1_HUMAN	Translin-associated factor X-interacting protein 1 OS=Homo sapiens GN=TSNAXIP1 PE=2 SV=1	76773	658	38.6	Q2TAA8	20	Yes	Yes	Yes	Yes	Yes	16q22.1	Evidence at transcript level	0	Cytoplasm, perinuclear region {ECO:0000250|UniProtKB:Q99P25}.	FUNCTION: Possible role in spermatogenesis. {ECO:0000250|UniProtKB:Q99P25}.	UE
Q2WGJ8	No	TMEM249 C8orfK29	sp|Q2WGJ8|TM249_HUMAN	Transmembrane protein 249 OS=Homo sapiens GN=TMEM249 PE=2 SV=1	27045	235	17.02	Q2WGJ8	3	No	No	No	No	Yes	8q24.3	Evidence at transcript level	2	Membrane {ECO:0000305}; Multi-pass membrane protein {ECO:0000305}.
Q32M84	Yes	BTBD16 C10orf87	sp|Q32M84|BTBDG_HUMAN	BTB/POZ domain-containing protein 16 OS=Homo sapiens GN=BTBD16 PE=2 SV=2	58481	506	47.63	Q32M84	20	Yes	Yes	Yes	Yes	Yes	10q26.13	Evidence at transcript level	0			PET
Q3KNT9	No	TMEM95 UNQ9390/PRO34281	sp|Q3KNT9|TMM95_HUMAN	Transmembrane protein 95 OS=Homo sapiens GN=TMEM95 PE=2 SV=1	19596	176	7.95	Q3KNT9	1	No	No	No	Yes	No	17p13.1	Evidence at transcript level	1	Membrane {ECO:0000305}; Single-pass type I membrane protein {ECO:0000305}.
Q3SY17	No	SLC25A52 MCART2	sp|Q3SY17|S2552_HUMAN	Solute carrier family 25 member 52 OS=Homo sapiens GN=SLC25A52 PE=2 SV=2	33721	297	14.48	Q3SY17	1	Yes	No	No	No	No	18q12.1	Evidence at transcript level	6	Mitochondrion inner membrane {ECO:0000305}; Multi-pass membrane protein {ECO:0000305}.
Q3ZCV2	Yes	LEXM LEM C1orf177	sp|Q3ZCV2|CA177_HUMAN	Uncharacterized protein C1orf177 OS=Homo sapiens GN=C1orf177 PE=2 SV=3	47609	418	27.51	Q3ZCV2	9	Yes	No	Yes	No	Yes	1p32.3	Evidence at transcript level	0	Mitochondrion {ECO:0000250|UniProtKB:A2AVQ5}.	FUNCTION: May have on role on T-cell metabolism however these data are controversial. {ECO:0000250|UniProtKB:A2AVQ5}.	PET
Q494V2	Yes	CCDC37	sp|Q494V2|CCD37_HUMAN	Coiled-coil domain-containing protein 37 OS=Homo sapiens GN=CCDC37 PE=2 SV=1	71117	611	12.11	Q494V2	7	Yes	Yes	No	No	Yes	3q21.3	Evidence at transcript level	0			PET
Q495T6	No	MMEL1 MELL1 MMEL2 NEP2	sp|Q495T6|MMEL1_HUMAN	Membrane metallo-endopeptidase-like 1 OS=Homo sapiens GN=MMEL1 PE=2 SV=2	89366	779	43.65	Q495T6	24	Yes	Yes	Yes	Yes	Yes	1p36.32	Evidence at transcript level	1	Membrane; Single-pass type II membrane protein. Secreted. Note=A secreted form produced by proteollytic cleavage also exists. {ECO:0000250}.	FUNCTION: Metalloprotease involved in sperm function, possibly by modulating the processes of fertilization and early embryonic development. Degrades a broad variety of small peptides with a preference for peptides shorter than 3 kDa containing neutral bulky aliphatic or aromatic amino acid residues. Shares the same substrate specificity with MME and cleaves peptides at the same amide bond (By si…
Q499Z3	No	SLFNL1	sp|Q499Z3|SLNL1_HUMAN	Schlafen-like protein 1 OS=Homo sapiens GN=SLFNL1 PE=2 SV=2	45602	407	46.93	Q499Z3	18	Yes	Yes	Yes	Yes	Yes	1p34.2	Evidence at transcript level	0			UE
Q4G0N8	No	SLC9C1 SLC9A10	sp|Q4G0N8|SL9C1_HUMAN	Sodium/hydrogen exchanger 10 OS=Homo sapiens GN=SLC9C1 PE=2 SV=2	135206	1177	4.59	Q4G0N8	4	No	No	No	No	Yes	3q13.2	Evidence at transcript level	16	Cell projection, cilium, flagellum membrane {ECO:0000250}; Multi-pass membrane protein {ECO:0000250}.	FUNCTION: Sperm-specific sodium/hydrogen exchanger involved in intracellular pH regulation of spermatozoa. Required for sperm motility and fertility. Involved in sperm cell hyperactivation, a step needed for sperm motility which is essential late in the preparation of sperm for fertilization. Required for the expression and bicarbonate regulation of the soluble adenylyl cyclase (sAC) (By similari…
Q4G1C9	No	GLIPR1L2	sp|Q4G1C9|GRPL2_HUMAN	GLIPR1-like protein 2 OS=Homo sapiens GN=GLIPR1L2 PE=2 SV=2	40178	344	37.21	Q4G1C9	10	Yes	Yes	Yes	Yes	Yes	12q21.2	Evidence at transcript level	1	Membrane {ECO:0000305}; Single-pass membrane protein {ECO:0000305}.
Q4ZJI4	Yes	SLC9B1 NHEDC1	sp|Q4ZJI4|SL9B1_HUMAN	Sodium/hydrogen exchanger 9B1 OS=Homo sapiens GN=SLC9B1 PE=2 SV=2	56053	515	13.79	Q4ZJI4	3	No	No	No	Yes	No	4q24	Evidence at transcript level	1	Membrane {ECO:0000305}; Multi-pass membrane protein {ECO:0000305}.		SET
Q502W6	Yes	VWA3B	sp|Q502W6|VWA3B_HUMAN	von Willebrand factor A domain-containing protein 3B OS=Homo sapiens GN=VWA3B PE=2 SV=3	145747	1294	8.27	Q502W6	7	Yes	Yes	Yes	No	No	2q11.2	Evidence at transcript level	0			PET
Q502W7	Yes	CCDC38	sp|Q502W7|CCD38_HUMAN	Coiled-coil domain-containing protein 38 OS=Homo sapiens GN=CCDC38 PE=2 SV=1	65314	563	29.31	Q502W7	15	Yes	Yes	Yes	No	Yes	12q23.1	Evidence at transcript level	0	Cytoplasm, cytoskeleton, microtubule organizing center, centrosome {ECO:0000269|PubMed:25074808}.		SET
Q537H7	Yes	SPATA45 C1orf227 HSD-44 HSD44	sp|Q537H7|SPT45_HUMAN	Spermatogenesis-associated protein 45 OS=Homo sapiens GN=SPATA45 PE=3 SV=1	11356	98	32.65	Q537H7	3	Yes	No	No	No	Yes	1q32.3	Inferred from homology	0			SET
Q53FE4	No	C4orf17	sp|Q53FE4|CD017_HUMAN	Uncharacterized protein C4orf17	39644	359	7.8	Q53FE4	2	Yes	No	No	No	No	4q23	Evidence at transcript level	0			SET	Yes
Q53SZ7	Yes	PRR30 C2orf53	sp|Q53SZ7|PRR30_HUMAN	Proline-rich protein 30 OS=Homo sapiens GN=PRR30 PE=2 SV=1	44689	412	37.86	Q53SZ7	12	Yes	Yes	Yes	No	Yes	2p23.3	Evidence at transcript level	0			IE	Yes
Q58FF6	No	HSP90AB4P	sp|Q58FF6|H90B4_HUMAN	Putative heat shock protein HSP 90-beta 4 OS=Homo sapiens GN=HSP90AB4P PE=5 SV=1	58264	505	17.23	Q58FF6	2	Yes	Yes	Yes	Yes	Yes	15q21.3	Uncertain	0	Cytoplasm {ECO:0000250}.	FUNCTION: Putative molecular chaperone that may promote the maturation, structural maintenance and proper regulation of specific target proteins. {ECO:0000250}.
Q5BJE1	No	CCDC178 C18orf34	sp|Q5BJE1|CC178_HUMAN	Coiled-coil domain-containing protein 178 OS=Homo sapiens GN=CCDC178 PE=2 SV=3	102011	867	3.58	Q5BJE1	3	No	No	No	No	Yes	18q12.1	Evidence at transcript level	0			IE
Q5GAN3	No	RNASE13	sp|Q5GAN3|RNS13_HUMAN	Probable inactive ribonuclease-like protein 13 OS=Homo sapiens GN=RNASE13 PE=2 SV=1	17844	156	35.26	Q5GAN3	6	Yes	Yes	Yes	Yes	Yes	14q11.2	Evidence at transcript level	0	Secreted {ECO:0000305}.	FUNCTION: Does not exhibit any ribonuclease activity. {ECO:0000305}.
Q5GH77	Yes	XKR3 XRG3	sp|Q5GH77|XKR3_HUMAN	XK-related protein 3 OS=Homo sapiens GN=XKR3 PE=2 SV=1	53448	459	5.01	Q5GH77	2	No	No	Yes	No	Yes	22q11.1	Evidence at transcript level	10	Cell membrane {ECO:0000269|PubMed:16431037}; Multi-pass membrane protein {ECO:0000269|PubMed:16431037}.			Yes
Q5H913	No	ARL13A	sp|Q5H913|AR13A_HUMAN	ADP-ribosylation factor-like protein 13A OS=Homo sapiens GN=ARL13A PE=2 SV=2	33003	290	12.76	Q5H913	3	Yes	No	No	No	No	Xq22.1	Evidence at transcript level	0
Q5H9T9	Yes	FSCB C14orf155	sp|Q5H9T9|FSCB_HUMAN	Fibrous sheath CABYR-binding protein OS=Homo sapiens GN=FSCB PE=2 SV=3	87955	825	15.27	Q5H9T9	8	Yes	No	No	Yes	No	14q21.2	Evidence at transcript level	0	Cell projection, cilium, flagellum {ECO:0000250}. Note=Localizes to cortex of the fibrous sheath including the surface of the longitudinal columns and ribs of the principal piece of sperm flagella. {ECO:0000250}.	FUNCTION: May be involved in the later stages of fibrous sheath biogenesis. Binds calcium (By similarity). {ECO:0000250}.	SET	Yes
Q5I0G3	No	MDH1B	sp|Q5I0G3|MDH1B_HUMAN	Putative malate dehydrogenase 1B OS=Homo sapiens GN=MDH1B PE=2 SV=1	58650	518	33.59	Q5I0G3	14	Yes	Yes	Yes	No	Yes	2q33.3	Evidence at transcript level	0			PET
Q5JRC9	Yes	FAM47A	sp|Q5JRC9|FA47A_HUMAN	Protein FAM47A OS=Homo sapiens GN=FAM47A PE=2 SV=3	90592	791	5.31	Q5JRC9	3	No	No	Yes	No	Yes	Xp21.1	Evidence at transcript level	0			SET
Q5JU00	Yes	TCTE1	sp|Q5JU00|TCTE1_HUMAN	T-complex-associated testis-expressed protein 1 OS=Homo sapiens GN=TCTE1 PE=2 SV=1	55632	501	36.73	Q5JU00	10	Yes	Yes	Yes	Yes	Yes	6p21.1	Evidence at transcript level	0			SET
Q5JU67	No	C9orf117	sp|Q5JU67|CI117_HUMAN	Uncharacterized protein C9orf117 OS=Homo sapiens GN=C9orf117 PE=2 SV=1	60533	520	33.65	Q5JU67	17	Yes	Yes	No	No	Yes	9q34.11	Evidence at transcript level	0
Q5JWF8	No	ACTL10 C20orf134	sp|Q5JWF8|ACL10_HUMAN	Actin-like protein 10 OS=Homo sapiens GN=ACTL10 PE=2 SV=1	26750	245	37.55	Q5JWF8	7	Yes	Yes	Yes	No	Yes	20q11.22	Evidence at transcript level	0			UE
Q5SQS8	Yes	C10orf120	sp|Q5SQS8|CJ120_HUMAN	Uncharacterized protein C10orf120 OS=Homo sapiens GN=C10orf120 PE=2 SV=1	39268	335	28.06	Q5SQS8	7	Yes	No	No	Yes	Yes	10q26.13	Evidence at transcript level	0				Yes
Q5SY80	Yes	C1orf101	sp|Q5SY80|CA101_HUMAN	Uncharacterized protein C1orf101 OS=Homo sapiens GN=C1orf101 PE=2 SV=1	109661	951	14.09	Q5SY80	11	No	No	No	No	Yes	1q44	Evidence at transcript level	1	Membrane {ECO:0000305}; Single-pass type I membrane protein {ECO:0000305}.		SET
Q5T0J7	No	Tex35 C1orf49	sp|Q5T0J7|TEX35_HUMAN	Testis-expressed sequence 35 protein OS=Homo sapiens GN=Tex35 PE=2 SV=1	26517	233	25.32	Q5T0J7	6	Yes	Yes	Yes	No	No	1q25.2	Evidence at transcript level	0			UE
Q5T1A1	Yes	DCST2	sp|Q5T1A1|DCST2_HUMAN	DC-STAMP domain-containing protein 2 OS=Homo sapiens GN=DCST2 PE=2 SV=2	86230	773	3.1	Q5T1A1	2	No	No	No	No	Yes	1q21.3	Evidence at transcript level	6	Membrane {ECO:0000305}; Multi-pass membrane protein {ECO:0000305}.
Q5T1B0	Yes	AXDND1 C1orf125	sp|Q5T1B0|AXDN1_HUMAN	Axonemal dynein light chain domain-containing protein 1 OS=Homo sapiens GN=AXDND1 PE=2 SV=1	118026	1012	23.32	Q5T1B0	19	Yes	Yes	Yes	No	Yes	1q25.2	Evidence at transcript level	0			SET
Q5T7R7	No	C1orf185	sp|Q5T7R7|CA185_HUMAN	Uncharacterized protein C1orf185 OS=Homo sapiens GN=C1orf185 PE=2 SV=1	22411	199	24.62	Q5T7R7	4	Yes	Yes	No	No	No	1p32.3	Evidence at transcript level	1	Membrane {ECO:0000305}; Single-pass membrane protein {ECO:0000305}.
Q5TBE3	Yes	C9orf153	sp|Q5TBE3|CI153_HUMAN	Uncharacterized protein C9orf153 OS=Homo sapiens GN=C9orf153 PE=4 SV=1	11253	101	28.71	Q5TBE3	2	Yes	No	Yes	No	No	9q21.33	Predicted	0
Q5TEZ5	Yes	C6orf163	sp|Q5TEZ5|CF163_HUMAN	Uncharacterized protein C6orf163 OS=Homo sapiens GN=C6orf163 PE=4 SV=2	38553	329	57.75	Q5TEZ5	22	Yes	Yes	No	Yes	Yes	6q15	Predicted	0			SET
Q5TFG8	Yes	ZC2HC1B C6orf94 FAM164B	sp|Q5TFG8|ZC21B_HUMAN	Zinc finger C2HC domain-containing protein 1B OS=Homo sapiens GN=ZC2HC1B PE=2 SV=2	24665	222	14.86	Q5TFG8	2	Yes	No	No	Yes	No	6q24.2	Evidence at transcript level	0			SET
Q5TGP6-2	No	MROH9 C1orf129	sp|Q5TGP6-2|MROH9_HUMAN	Isoform 2 of Maestro heat-like repeat-containing protein family member 9 OS=Homo sapiens GN=MROH9	98344	573	4.76	Q5TGP6	3	No	No	No	No	Yes	1q24.3	Evidence at transcript level	0
Q5VTH9	Yes	WDR78	sp|Q5VTH9|WDR78_HUMAN	WD repeat-containing protein 78 OS=Homo sapiens GN=WDR78 PE=2 SV=1	94572	848	31.01	Q5VTH9	21	Yes	Yes	Yes	No	Yes	1p31.3	Evidence at transcript level	0			SET
Q5VZ72	Yes	IZUMO3 C9orf134	sp|Q5VZ72|IZUM3_HUMAN	Izumo sperm-egg fusion protein 3 OS=Homo sapiens GN=IZUMO3 PE=3 SV=4	27767	239	33.89	Q5VZ72	8	Yes	Yes	Yes	Yes	Yes	9p21.3	Inferred from homology	1	Cell membrane {ECO:0000305}; Single-pass type I membrane protein {ECO:0000305}.			Yes
Q5VZQ5	Yes	TEX36 C10orf122	sp|Q5VZQ5|TEX36_HUMAN	Testis-expressed sequence 36 protein OS=Homo sapiens GN=TEX36 PE=2 SV=1	21544	186	34.95	Q5VZQ5	6	Yes	Yes	Yes	No	Yes	10q26.13	Evidence at transcript level	0			SET	Yes
Q5XX13	No	FBXW10	sp|Q5XX13|FBW10_HUMAN	F-box/WD repeat-containing protein 10 OS=Homo sapiens GN=FBXW10 PE=2 SV=2	119845	1052	9.41	Q5XX13	2	No	Yes	No	Yes	No	17p11.2	Evidence at transcript level	0		FUNCTION: Probable substrate-recognition component of a SCF (SKP1-CUL1-F-box protein)-type E3 ubiquitin ligase complex which mediates the ubiquitination and subsequent proteasomal degradation of target proteins. Overexpression is leading to degradation of CBX5 and CBX1. {ECO:0000269|PubMed:20498703}.	PET
Q63HN1	No	FAM205BP C9orf144 C9orf144A FAM205B	sp|Q63HN1|F205B_HUMAN	Putative protein FAM205B OS=Homo sapiens GN=FAM205BP PE=5 SV=1	61860	556	40.29	Q63HN1	1	Yes	Yes	Yes	No	No	9p13.3	Uncertain	0			SET	Yes
Q68DN1	Yes	C2orf16	sp|Q68DN1|CB016_HUMAN	Uncharacterized protein C2orf16 OS=Homo sapiens GN=C2orf16 PE=2 SV=3	224321	1984	42.04	Q68DN1	62	Yes	Yes	Yes	Yes	Yes	2p23.3	Evidence at transcript level	0			UE
Q68G75	Yes	LEMD1	sp|Q68G75|LEMD1_HUMAN	LEM domain-containing protein 1 OS=Homo sapiens GN=LEMD1 PE=2 SV=2	20325	181	14.36	Q68G75	2	Yes	Yes	No	No	Yes	1q32.1	Evidence at transcript level	1	Membrane {ECO:0000305}; Single-pass membrane protein {ECO:0000305}.		SET
Q6ICG8	No	WBP2NL PAWP	sp|Q6ICG8|WBP2L_HUMAN	Postacrosomal sheath WW domain-binding protein OS=Homo sapiens GN=WBP2NL PE=2 SV=1	31909	309	39.48	Q6ICG8	11	Yes	Yes	Yes	Yes	Yes	22q13.2	Evidence at transcript level	0		FUNCTION: May play a role in meotic resumption and pronuclear formation, mediated by a WW domain-signaling pathway during fertilization. {ECO:0000250}.
Q6IPT2-2	No	FAM71E1	sp|Q6IPT2-2|F71E1_HUMAN	Isoform 2 of Protein FAM71E1 OS=Homo sapiens GN=FAM71E1	25776	247	10.82	Q6IPT2-2	2	No	No	Yes	Yes	Yes	19q13.33	Evidence at transcript level	0			UE
Q6NXN4	No	DPY19L2P1	sp|Q6NXN4|D19P1_HUMAN	Putative C-mannosyltransferase DPY19L2P1 OS=Homo sapiens GN=DPY19L2P1 PE=2 SV=1	28035	242	15.29	Q6NXN4	1	No	No	No	No	Yes	7p14.2	Evidence at transcript level	3	Membrane {ECO:0000305}; Multi-pass membrane protein {ECO:0000305}.	FUNCTION: Probable C-mannosyltransferase that mediates C-mannosylation of tryptophan residues on target proteins. {ECO:0000250}.
Q6NXP6	Yes	NOXRED1 C14orf148	sp|Q6NXP6|NXRD1_HUMAN	NADP-dependent oxidoreductase domain-containing protein 1 OS=Homo sapiens GN=NOXRED1 PE=2 SV=2	39879	359	7.8	Q6NXP6	2	Yes	No	No	No	Yes	14q24.3	Evidence at transcript level	0		FUNCTION: Probable oxidoreductase. {ECO:0000250}.	SET
Q6P2C0	Yes	WDR93	sp|Q6P2C0|WDR93_HUMAN	WD repeat-containing protein 93 OS=Homo sapiens GN=WDR93 PE=2 SV=1	77378	686	10.79	Q6P2C0	6	Yes	No	Yes	No	Yes	15q26.1	Evidence at transcript level	0
Q6P2D8	Yes	XRRA1	sp|Q6P2D8|XRRA1_HUMAN	X-ray radiation resistance-associated protein 1 OS=Homo sapiens GN=XRRA1 PE=2 SV=2	89863	792	11.11	Q6P2D8	6	Yes	No	No	Yes	Yes	11q13.4	Evidence at transcript level	0	Cytoplasm {ECO:0000269|PubMed:12908878}. Nucleus {ECO:0000269|PubMed:12908878}.	FUNCTION: May be involved in the response of cells to X-ray radiation. {ECO:0000269|PubMed:12908878}.
Q6PDA7-2	No	SPAG11A EP2 HE2	sp|Q6PDA7-2|SG11A_HUMAN	Isoform 2 of Sperm-associated antigen 11A OS=Homo sapiens GN=SPAG11A	12003	123	12.04	Q6PDA7-2	1	No	No	No	No	Yes	8p23.1	Evidence at transcript level	0	Secreted.
Q6PI97	Yes	C11orf88	sp|Q6PI97|CK088_HUMAN	UPF0722 protein C11orf88 OS=Homo sapiens GN=C11orf88 PE=2 SV=2	19339	169	10.65	Q6PI97	3	No	No	No	Yes	No	11q23.1	Evidence at transcript level	0			PET
Q6PIY5	Yes	C1orf228 NCRNA00082	sp|Q6PIY5|CA228_HUMAN	Uncharacterized protein C1orf228 OS=Homo sapiens GN=C1orf228 PE=2 SV=2	48854	440	41.82	Q6PIY5	14	Yes	Yes	Yes	No	Yes	1p34.1	Evidence at transcript level	0
Q6UW60	No	PCSK4 PC4 UNQ2757/PRO6496	sp|Q6UW60|PCSK4_HUMAN		82794	755	1.59	Q6UW60	1	No	No	Yes	No	No	19p13.3	Evidence at transcript level	1	Membrane {ECO:0000255}; Single-pass membrane protein {ECO:0000255}.	FUNCTION: Involved in the processing of hormone and other protein precursors at sites comprised of pairs of basic amino acid residues. Plays a role in transcriptional coactivation. May be involved in stabilizing the multiprotein transcription complex. {ECO:0000269|PubMed:16040806}.
Q6UWQ5	Yes	LYZL1 LYC2 UNQ648/PRO1278	sp|Q6UWQ5|LYZL1_HUMAN	Lysozyme-like protein 1 OS=Homo sapiens GN=LYZL1 PE=2 SV=2	16654	148	27.03	Q6UWQ5	2	No	Yes	No	Yes	Yes	10p11.23	Evidence at transcript level	0	Secreted {ECO:0000305}.		SET	Yes
Q6UXN7	Yes	TOMM20L UNQ9438/PRO34772	sp|Q6UXN7|TO20L_HUMAN	TOMM20-like protein 1 OS=Homo sapiens GN=TOMM20L PE=2 SV=1	17699	152	6.58	Q6UXN7	1	No	Yes	No	No	Yes	14q23.1	Evidence at transcript level	1	Mitochondrion outer membrane {ECO:0000305}; Single-pass membrane protein {ECO:0000305}.
Q6V702	No	C4orf22	sp|Q6V702|CD022_HUMAN	Uncharacterized protein C4orf22 OS=Homo sapiens GN=C4orf22 PE=2 SV=4	26869	233	31.33	Q6V702	10	Yes	Yes	No	Yes	Yes	4q21.21	Evidence at transcript level	0			SET
Q6ZMY6	Yes	WDR88 PQWD	sp|Q6ZMY6|WDR88_HUMAN	WD repeat-containing protein 88 OS=Homo sapiens GN=WDR88 PE=2 SV=2	52620	472	11.02	Q6ZMY6	4	Yes	No	No	No	Yes	19q13.11	Evidence at transcript level	0			SET
Q6ZNQ3	No	LRRC69	sp|Q6ZNQ3|LRC69_HUMAN	Leucine-rich repeat-containing protein 69 OS=Homo sapiens GN=LRRC69 PE=2 SV=2	39591	347	3.46	Q6ZNQ3	1	No	No	No	Yes	Yes	8q21.3	Evidence at transcript level	0
Q6ZRH7	No	CATSPERG C19orf15	sp|Q6ZRH7|CTSRG_HUMAN	Cation channel sperm-associated protein subunit gamma OS=Homo sapiens GN=CATSPERG PE=2 SV=3	133031	1159	15.01	Q6ZRH7	15	No	Yes	Yes	No	Yes	19q13.2	Evidence at transcript level	1	Membrane {ECO:0000305}; Single-pass type I membrane protein {ECO:0000305}.	FUNCTION: Probably involved in sperm cell hyperactivation via its association with CATSPER1. Sperm cell hyperactivation is needed for sperm motility which is essential late in the preparation of sperm for fertilization (By similarity). {ECO:0000250}.	PET
Q6ZUB0	No	SPATA31D4 FAM75D4	sp|Q6ZUB0|S31D4_HUMAN	Putative spermatogenesis-associated protein 31D4 OS=Homo sapiens GN=SPATA31D4 PE=5 SV=1	102389	917	52.24	Q6ZUB0	1	Yes	No	No	No	No	9q21.32	Uncertain	1	Membrane {ECO:0000305}; Single-pass membrane protein {ECO:0000305}.	FUNCTION: May play a role in spermatogenesis. {ECO:0000250}.
Q6ZUB1	No	SPATA31E1 C9orf79 FAM75E1	sp|Q6ZUB1|S31E1_HUMAN	Spermatogenesis-associated protein 31E1 OS=Homo sapiens GN=SPATA31E1 PE=2 SV=2	157135	1445	42.21	Q6ZUB1	44	Yes	Yes	Yes	No	Yes	9q22.1	Evidence at transcript level	1	Membrane {ECO:0000305}; Single-pass membrane protein {ECO:0000305}.	FUNCTION: May play a role in spermatogenesis. {ECO:0000250}.		Yes
Q6ZUG5	No		sp|Q6ZUG5|YC006_HUMAN	Uncharacterized protein FLJ43738 OS=Homo sapiens PE=2 SV=1	66039	572	20.45	Q6ZUG5	10	Yes	Yes	No	Yes	Yes	3q21.3	Evidence at transcript level	0
Q6ZVS7	No	FAM183B	sp|Q6ZVS7|F183B_HUMAN	Protein FAM183B OS=Homo sapiens GN=FAM183B PE=2 SV=2	16193	135	34.81	Q6ZVS7	4	Yes	Yes	Yes	No	No	7p14.1	Evidence at transcript level	0
Q7RTY9	No	PRSS41 TESSP1	sp|Q7RTY9|PRS41_HUMAN	Putative serine protease 41 OS=Homo sapiens GN=PRSS41 PE=5 SV=1	35078	318	5.35	Q7RTY9	1	Yes	No	No	No	No	16p13.3	Uncertain	0	Cell membrane; Lipid-anchor, GPI-anchor. Note=Localized in the plasma membrane of spermatogonia. Localized in intracellular compartment in spermatocytes, probably in the Golgi apparatus (By similarity). {ECO:0000250}.
Q7Z2V1	No	C16orf82	sp|Q7Z2V1|TNT_HUMAN	Protein TNT OS=Homo sapiens GN=C16orf82 PE=2 SV=1	23111	217	15.67	Q7Z2V1	2	Yes	Yes	No	Yes	No	16p12.1	Evidence at transcript level	0			IE
Q7Z4T8	No	GALNTL5 GALNT15	sp|Q7Z4T8|GLTL5_HUMAN		51427	443	2.93	Q7Z4T8	1	No	No	Yes	No	No	7q36.1	Evidence at transcript level	1	Late endosome membrane {ECO:0000305}; Single-pass type II membrane protein {ECO:0000305}. Note=Localizes to the juxtanuclear region, possibly the late endosome. Not localized in the Golgi apparatus in round spermatids (By similarity). {ECO:0000250}.	FUNCTION: Probable inactive glycosyltransferase required during spermatid development. May participate to protein loading into the acrosomes and accumulation of ubiquitin-proteasome systems around the head-tail coupling apparatus region.	SET
Q7Z4W2	No	LYZL2	sp|Q7Z4W2|LYZL2_HUMAN	Lysozyme-like protein 2 OS=Homo sapiens GN=LYZL2 PE=2 SV=2	16656	148	27.03	Q7Z4W2	2	Yes	Yes	Yes	Yes	Yes	10p11.23	Evidence at transcript level	0	Secreted {ECO:0000305}.		SET	Yes
Q7Z5J8	Yes	ANKAR	sp|Q7Z5J8|ANKAR_HUMAN	Ankyrin and armadillo repeat-containing protein OS=Homo sapiens GN=ANKAR PE=2 SV=3	162025	1434	13.32	Q7Z5J8	15	Yes	Yes	Yes	No	Yes	2q32.2	Evidence at transcript level	1	Membrane {ECO:0000305}; Single-pass membrane protein {ECO:0000305}.		SET
Q7Z7B7	Yes	DEFB132 DEFB32 UNQ827/PRO1754	sp|Q7Z7B7|DB132_HUMAN	Beta-defensin 132 OS=Homo sapiens GN=DEFB132 PE=3 SV=1	10610	95	10.53	Q7Z7B7	1	No	No	Yes	No	No	20p13	Inferred from homology	0	Secreted {ECO:0000305}.	FUNCTION: Has antibacterial activity. {ECO:0000305}.
Q86TZ1-2	No	TTC6	sp|Q86TZ1-2|TTC6_HUMAN	Isoform 2 of Tetratricopeptide repeat protein 6 OS=Homo sapiens GN=TTC6	60700	520	6.53	Q86TZ1	3	No	No	Yes	No	Yes	14q21.1	Evidence at transcript level	0			PET
Q86UG4	Yes	SLCO6A1 OATP6A1 SLC21A19	sp|Q86UG4|SO6A1_HUMAN	Solute carrier organic anion transporter family member 6A1 OS=Homo sapiens GN=SLCO6A1 PE=2 SV=2	79232	719	26.01	Q86UG4	15	No	Yes	Yes	Yes	Yes	5q21.1	Evidence at transcript level	12	Cell membrane; Multi-pass membrane protein.		SET	Yes
Q86VE3	No	SATL1	sp|Q86VE3|SATL1_HUMAN	Spermidine/spermine N(1)-acetyltransferase-like protein 1 OS=Homo sapiens GN=SATL1 PE=2 SV=3	55832	508	7.09	Q86VE3	2	No	Yes	No	No	Yes	Xq21.1	Evidence at transcript level	0
Q86VS3	Yes	IQCH	sp|Q86VS3|IQCH_HUMAN	IQ domain-containing protein H OS=Homo sapiens GN=IQCH PE=2 SV=2	117348	1027	11	Q86VS3	9	Yes	No	Yes	No	Yes	15q23	Evidence at transcript level	0		FUNCTION: May play a regulatory role in spermatogenesis. {ECO:0000269|PubMed:15897968}.	SET
Q86WZ0	Yes	HEATR4	sp|Q86WZ0|HEAT4_HUMAN	HEAT repeat-containing protein 4 OS=Homo sapiens GN=HEATR4 PE=2 SV=2	117175	1026	4.68	Q86WZ0	3	No	No	No	No	Yes	14q24.3	Evidence at transcript level	0			SET
Q86X67	Yes	NUDT13	sp|Q86X67|NUD13_HUMAN	Nucleoside diphosphate-linked moiety X motif 13 OS=Homo sapiens GN=NUDT13 PE=2 SV=3	39688	352	3.69	Q86X67	1	Yes	No	No	Yes	No	10q22.2	Evidence at transcript level	0			PET
Q8IUB5	No	WFDC13 C20orf138 WAP13	sp|Q8IUB5|WFD13_HUMAN	WAP four-disulfide core domain protein 13 OS=Homo sapiens GN=WFDC13 PE=3 SV=1	10386	93	22.58	Q8IUB5	2	No	Yes	Yes	No	Yes	20q13.12	Inferred from homology	0	Secreted {ECO:0000305}.	FUNCTION: Putative acid-stable proteinase inhibitor. {ECO:0000250}.
Q8IVL8	Yes	CPO	sp|Q8IVL8|CBPO_HUMAN	Carboxypeptidase O OS=Homo sapiens GN=CPO PE=2 SV=1	42529	374	12.83	Q8IVL8	3	No	Yes	Yes	Yes	No	2q33.3	Evidence at transcript level	0	Secreted {ECO:0000305}.	FUNCTION: Probable carboxypeptidase which may cleave proteins with C-terminal acidic residues. {ECO:0000250}.
Q8IVU9	No	C10orf107	sp|Q8IVU9|CJ107_HUMAN	Uncharacterized protein C10orf107 OS=Homo sapiens GN=C10orf107 PE=2 SV=1	23883	208	43.75	Q8IVU9	7	Yes	Yes	Yes	No	Yes	10q21.2	Evidence at transcript level	0
Q8IWF9	Yes	CCDC83 HSD9	sp|Q8IWF9|CCD83_HUMAN	Coiled-coil domain-containing protein 83 OS=Homo sapiens GN=CCDC83 PE=2 SV=2	48850	413	8.23	Q8IWF9	2	No	No	No	No	Yes	11q14.1	Evidence at transcript level	0			SET	Yes
Q8IXM7	No	ODF3L1	sp|Q8IXM7|OD3L1_HUMAN	Outer dense fiber protein 3-like protein 1 OS=Homo sapiens GN=ODF3L1 PE=2 SV=1	31064	274	57.66	Q8IXM7	12	Yes	Yes	No	Yes	Yes	15q24.2	Evidence at transcript level	0			PET
Q8IXW0	No	LMNTD2 C11orf35	sp|Q8IXW0|LMTD2_HUMAN	Lamin tail domain-containing protein 2 OS=Homo sapiens GN=LMNTD2 PE=2 SV=2	70378	634	24.76	Q8IXW0	10	No	Yes	Yes	Yes	Yes	11p15.5	Evidence at transcript level	0
Q8IYJ2	Yes	C10orf67	sp|Q8IYJ2|CJ067_HUMAN	Uncharacterized protein C10orf67 OS=Homo sapiens GN=C10orf67 PE=2 SV=2	21594	185	32.43	Q8IYJ2	4	No	No	No	No	Yes	10p12.2	Evidence at transcript level	0
Q8IYM0	No	FAM186B C12orf25	sp|Q8IYM0|F186B_HUMAN	Protein FAM186B OS=Homo sapiens GN=FAM186B PE=2 SV=2	103721	893	21.39	Q8IYM0	15	Yes	Yes	Yes	No	No	12q13.12	Evidence at transcript level	0			UE	Yes
Q8IYU4	Yes	UBQLNL	sp|Q8IYU4|UBQLN_HUMAN	Ubiquilin-like protein OS=Homo sapiens GN=UBQLNL PE=2 SV=3	52896	475	3.58	Q8IYU4	1	Yes	No	No	No	No	11p15.4	Evidence at transcript level	0
Q8IYW2	Yes	CFAP46 C10orf123 C10orf124 C10orf92 C10orf93 TTC40	sp|Q8IYW2|CFA46_HUMAN	Cilia- and flagella-associated protein 46 OS=Homo sapiens GN=CFAP46 PE=2 SV=3	303500	2715	18.34	Q8IYW2	34	Yes	Yes	Yes	No	Yes	10q26.3	Evidence at transcript level	0	Cytoplasm, cytoskeleton, cilium axoneme {ECO:0000250|UniProtKB:A8ICS9}.	FUNCTION: As part of the central apparatus of the cilium axoneme plays a role in cilium movement. {ECO:0000250|UniProtKB:A8ICS9}.	PET
Q8N0W5	Yes	IQCK	sp|Q8N0W5|IQCK_HUMAN	IQ domain-containing protein K OS=Homo sapiens GN=IQCK PE=2 SV=1	33291	287	37.63	Q8N0W5	9	Yes	Yes	Yes	No	Yes	16p12.3	Evidence at transcript level	0			UE
Q8N309	Yes	LRRC43	sp|Q8N309|LRC43_HUMAN	Leucine-rich repeat-containing protein 43 OS=Homo sapiens GN=LRRC43 PE=2 SV=2	73021	656	23.02	Q8N309	10	Yes	Yes	No	No	Yes	12q24.31	Evidence at transcript level	0
Q8N456	No	LRRC18 UNQ9338/PRO34010	sp|Q8N456|LRC18_HUMAN	Leucine-rich repeat-containing protein 18 OS=Homo sapiens GN=LRRC18 PE=2 SV=2	29736	261	36.4	Q8N456	7	Yes	Yes	Yes	Yes	Yes	10q11.23	Evidence at transcript level	0	Cytoplasm {ECO:0000250}.	FUNCTION: May be involved in the regulation of spermatogenesis and sperm maturation. {ECO:0000250}.
Q8N4B4	Yes	FBXO39 FBX39	sp|Q8N4B4|FBX39_HUMAN	F-box only protein 39 OS=Homo sapiens GN=FBXO39 PE=2 SV=1	52645	442	2.04	Q8N4B4	1	No	No	Yes	No	Yes	17p13.1	Evidence at transcript level	0		FUNCTION: Substrate-recognition component of the SCF (SKP1-CUL1-F-box protein)-type E3 ubiquitin ligase complex. {ECO:0000250}.	SET
Q8N4L4	No	SPEM1 C17orf83	sp|Q8N4L4|SPEM1_HUMAN	Spermatid maturation protein 1 OS=Homo sapiens GN=SPEM1 PE=2 SV=1	34773	309	45.95	Q8N4L4	10	Yes	Yes	Yes	No	Yes	17p13.1	Evidence at transcript level	1	Membrane {ECO:0000305}; Single-pass membrane protein {ECO:0000305}. Cytoplasm {ECO:0000250}.	FUNCTION: Required for proper cytoplasm removal during spermatogenesis. {ECO:0000250}.	UE	Yes
Q8N4P6	No	LRRC71 C1orf92	sp|Q8N4P6|LRC71_HUMAN	Leucine-rich repeat-containing protein 71 OS=Homo sapiens GN=LRRC71 PE=2 SV=1	61825	559	33.63	Q8N4P6	15	Yes	Yes	Yes	No	Yes	1q23.1	Evidence at transcript level	0
Q8N5S1	Yes	SLC25A41	sp|Q8N5S1|S2541_HUMAN	Solute carrier family 25 member 41 OS=Homo sapiens GN=SLC25A41 PE=2 SV=2	40795	370	24.59	Q8N5S1	6	Yes	Yes	Yes	Yes	No	19p13.3	Evidence at transcript level	6	Mitochondrion inner membrane {ECO:0000250|UniProtKB:O94502}; Multi-pass membrane protein {ECO:0000250|UniProtKB:O94502}.		SET
Q8N5S3	Yes	C2orf73	sp|Q8N5S3|CB073_HUMAN	Uncharacterized protein C2orf73 OS=Homo sapiens GN=C2orf73 PE=2 SV=3	32142	287	19.86	Q8N5S3	4	Yes	No	No	No	No	2p16.2	Evidence at transcript level	0			SET
Q8N5U0	Yes	C11orf42	sp|Q8N5U0|CK042_HUMAN	Uncharacterized protein C11orf42 OS=Homo sapiens GN=C11orf42 PE=2 SV=2	36367	333	16.22	Q8N5U0	3	Yes	Yes	No	No	Yes	11p15.4	Evidence at transcript level	0			SET
Q8N5W8	Yes	FAM24B	sp|Q8N5W8|FA24B_HUMAN	Protein FAM24B OS=Homo sapiens GN=FAM24B PE=3 SV=2	10147	94	18.09	Q8N5W8	1	No	Yes	Yes	No	No	10q26.13	Inferred from homology	0	Secreted {ECO:0000305}.
Q8N688	Yes	DEFB123 DEFB23 UNQ1963/PRO4485	sp|Q8N688|DB123_HUMAN	Beta-defensin 123 OS=Homo sapiens GN=DEFB123 PE=2 SV=1	8104	67	13.43	Q8N688	1	No	No	No	No	Yes	20q11.21	Evidence at transcript level	0	Secreted {ECO:0000305}.	FUNCTION: Has antibacterial activity. {ECO:0000305}.	SET	Yes
Q8N6G2	Yes	TEX26 C13orf26	sp|Q8N6G2|TEX26_HUMAN	Testis-expressed sequence 26 protein OS=Homo sapiens GN=TEX26 PE=2 SV=1	33595	289	42.21	Q8N6G2	9	Yes	Yes	No	Yes	Yes	13q12.3	Evidence at transcript level	0			SET
Q8N6K0	No	TEX29 C13orf16	sp|Q8N6K0|TEX29_HUMAN	Testis-expressed sequence 29 protein OS=Homo sapiens GN=TEX29 PE=2 SV=1	16649	151	30.46	Q8N6K0	3	Yes	No	Yes	Yes	Yes	13q34	Evidence at transcript level	1	Membrane {ECO:0000305}; Single-pass membrane protein {ECO:0000305}.		PET
Q8N6M8	No	IQCF1	sp|Q8N6M8|IQCF1_HUMAN	IQ domain-containing protein F1 OS=Homo sapiens GN=IQCF1 PE=2 SV=2	23698	205	32.2	Q8N6M8	6	Yes	Yes	Yes	No	No	3p21.2	Evidence at transcript level	0	Cytoplasmic vesicle, secretory vesicle, acrosome {ECO:0000269|PubMed:25380116}.	FUNCTION: Involved in sperm capacitation and acrosome reaction. {ECO:0000250|UniProtKB:Q9D9K8}.	PET	Yes
Q8N6V4	Yes	C10orf53	sp|Q8N6V4|CJ053_HUMAN	UPF0728 protein C10orf53 OS=Homo sapiens GN=C10orf53 PE=3 SV=3	10399	93	18.28	Q8N6V4	1	No	No	No	No	Yes	10q11.23	Inferred from homology	0			IE	Yes
Q8N7B9	No	EFCAB3	sp|Q8N7B9|EFCB3_HUMAN	EF-hand calcium-binding domain-containing protein 3 OS=Homo sapiens GN=EFCAB3 PE=2 SV=1	50146	438	50.46	Q8N7B9	20	Yes	Yes	Yes	Yes	Yes	17q23.2	Evidence at transcript level	0			SET
Q8N7C7	Yes	RNF148	sp|Q8N7C7|RN148_HUMAN	RING finger protein 148 OS=Homo sapiens GN=RNF148 PE=2 SV=2	34396	305	3.61	Q8N7C7	1	No	No	No	Yes	Yes	7q31.32	Evidence at transcript level	1	Membrane {ECO:0000305}; Single-pass membrane protein {ECO:0000305}.		SET	Yes
Q8N7X0	No	ADGB C6orf103 CAPN7L	sp|Q8N7X0|ADGB_HUMAN	Androglobin OS=Homo sapiens GN=ADGB PE=2 SV=3	189713	1667	25.01	Q8N7X0	32	Yes	Yes	Yes	Yes	Yes	6q24.3	Evidence at transcript level	0			SET
Q8N7X2-4	No	C9orf173	sp|Q8N7X2-4|CI173_HUMAN	Isoform 4 of Uncharacterized protein C9orf173 OS=Homo sapiens GN=C9orf173	34133	389	42.21	Q8N7X2-4	9	Yes	Yes	No	No	Yes	9q34.3	Evidence at transcript level	0
Q8N801	Yes	C2orf61	sp|Q8N801|CB061_HUMAN	Uncharacterized protein C2orf61 OS=Homo sapiens GN=C2orf61 PE=2 SV=2	27806	248	41.94	Q8N801	8	Yes	No	No	No	Yes	2p21	Evidence at transcript level	0				Yes
Q8N9W8	No	FAM71D	sp|Q8N9W8|FA71D_HUMAN	Protein FAM71D	47076	422	2.13	Q8N9W8	1	Yes	No	No	No	No	14q23.3	Evidence at transcript level	0			SET	Yes
Q8N9Z9	No	LMNTD1 IFLTD1	sp|Q8N9Z9|LMTD1_HUMAN	Lamin tail domain-containing protein 1 OS=Homo sapiens GN=LMNTD1 PE=2 SV=2	43408	388	5.93	Q8N9Z9	1	No	No	No	No	Yes	12p12.1	Evidence at transcript level	0
Q8NA56	No	TTC29	sp|Q8NA56|TTC29_HUMAN	Tetratricopeptide repeat protein 29 OS=Homo sapiens GN=TTC29 PE=2 SV=2	55081	475	34.53	Q8NA56	13	Yes	Yes	Yes	No	Yes	4q31.22	Evidence at transcript level	0			PET
Q8NA66	No	CNBD1	sp|Q8NA66|CNBD1_HUMAN	Cyclic nucleotide-binding domain-containing protein 1 OS=Homo sapiens GN=CNBD1 PE=2 SV=1	50224	436	2.06	Q8NA66	1	No	No	No	No	Yes	8q21.3	Evidence at transcript level	0			SET
Q8NA69	No	C19orf45	sp|Q8NA69|CS045_HUMAN	Uncharacterized protein C19orf45 OS=Homo sapiens GN=C19orf45 PE=2 SV=2	57331	505	28.51	Q8NA69	10	Yes	No	Yes	No	Yes	19p13.2	Evidence at transcript level	0
Q8NCQ7	No	PROCA1	sp|Q8NCQ7|PRCA1_HUMAN	Protein PROCA1 OS=Homo sapiens GN=PROCA1 PE=2 SV=2	40522	364	18.41	Q8NCQ7	5	Yes	Yes	Yes	No	Yes	17q11.2	Evidence at transcript level	0			UE
Q8NCU1	No	LINC00521	sp|Q8NCU1|CN048_HUMAN	Putative uncharacterized protein encoded by LINC00521	15808	140	18.57	Q8NCU1	1	Yes	No	No	No	No	14q32.12	Uncertain	0			SET
Q8ND07	No	BBOF1 C14orf45 CCDC176	sp|Q8ND07|BBOF1_HUMAN	Basal body-orientation factor 1 OS=Homo sapiens GN=CCDC176 PE=2 SV=3	61986	529	11.15	Q8ND07	7	Yes	No	No	No	No	14q24.3	Evidence at transcript level	0	Cytoplasm, cytoskeleton, cilium basal body {ECO:0000250}. Note=Localizes to a polar structure adjacent to the basal body. {ECO:0000250}.	FUNCTION: Basal body protein required in multiciliate cells to align and maintain cilia orientation in response to flow. May act by mediating a maturation step that stabilizes and aligns cilia orientation. Not required to respond to planar cell polarity (PCP) or flow-based orientation cues (By similarity). {ECO:0000250}.
Q8ND61	No	C3orf20	sp|Q8ND61|CC020_HUMAN	Uncharacterized protein C3orf20 OS=Homo sapiens GN=C3orf20 PE=2 SV=2	101266	904	11.62	Q8ND61	8	Yes	Yes	Yes	Yes	Yes	3p25.1	Evidence at transcript level	1	Membrane {ECO:0000305}; Single-pass membrane protein {ECO:0000305}.
Q8NDH2	Yes	CCDC168 C13orf40	sp|Q8NDH2|CC168_HUMAN	Coiled-coil domain-containing protein 168 OS=Homo sapiens GN=CCDC168 PE=2 SV=2	277951	2452	4.73	Q8NDH2	9	Yes	No	Yes	No	No	13q33.1	Evidence at transcript level	0			SET
Q8NE28	No	STKLD1 C9orf96 SGK071	sp|Q8NE28|STKL1_HUMAN	Serine/threonine kinase-like domain-containing protein STKLD1 OS=Homo sapiens GN=STKLD1 PE=2 SV=4	75675	680	28.53	Q8NE28	14	Yes	Yes	Yes	Yes	Yes	9q34.2	Evidence at transcript level	0			PET
Q8NEA5	No	C19orf18	sp|Q8NEA5|CS018_HUMAN	Uncharacterized protein C19orf18 OS=Homo sapiens GN=C19orf18 PE=2 SV=1	24150	215	29.3	Q8NEA5	4	Yes	Yes	Yes	Yes	Yes	19q13.43	Evidence at transcript level	1	Membrane {ECO:0000305}; Single-pass type I membrane protein {ECO:0000305}.		PET
Q8NEE8	No	TTC16	sp|Q8NEE8|TTC16_HUMAN	Tetratricopeptide repeat protein 16 OS=Homo sapiens GN=TTC16 PE=2 SV=2	98308	873	10.31	Q8NEE8	7	Yes	No	Yes	No	Yes	9q34.11	Evidence at transcript level	0			PET
Q8NEX6	Yes	WFDC11 WAP11	sp|Q8NEX6|WFD11_HUMAN	Protein WFDC11 OS=Homo sapiens GN=WFDC11 PE=3 SV=1	10340	87	16.09	Q8NEX6	1	No	Yes	No	Yes	Yes	20q13.12	Inferred from homology	0	Secreted {ECO:0000305}.
Q8NG35	Yes	DEFB105A BD5 DEFB105 DEFB5; DEFB105B	sp|Q8NG35|D105A_HUMAN	Beta-defensin 105 OS=Homo sapiens GN=DEFB105A PE=2 SV=1	8922	78	25.64	Q8NG35	2	No	No	Yes	Yes	Yes	8p23.1	Evidence at transcript level	0	Secreted.	FUNCTION: Has antibacterial activity. {ECO:0000305}.
Q8NHS2	Yes	GOT1L1	sp|Q8NHS2|AATC2_HUMAN	Putative aspartate aminotransferase, cytoplasmic 2 OS=Homo sapiens GN=GOT1L1 PE=2 SV=2	47305	421	21.85	Q8NHS2	6	Yes	No	No	Yes	Yes	8p11.23	Evidence at transcript level	0	Cytoplasm {ECO:0000250}.		SET	Yes
Q8NHU2	Yes	CFAP61 C20orf26	sp|Q8NHU2|CFA61_HUMAN	Cilia- and flagella-associated protein 61 OS=Homo sapiens GN=CFAP61 PE=2 SV=3	141348	1237	35.41	Q8NHU2	33	Yes	Yes	Yes	No	Yes	20p11.23	Evidence at transcript level	0			SET
Q8NHX4	No	SPATA3 TSARG1	sp|Q8NHX4|SPTA3_HUMAN	Spermatogenesis-associated protein 3 OS=Homo sapiens GN=SPATA3 PE=2 SV=2	20900	192	30.21	Q8NHX4	5	Yes	Yes	Yes	No	No	2q37.1	Evidence at transcript level	0			UE	Yes
Q8TBY8	No	PMFBP1	sp|Q8TBY8-2|PMFBP_HUMAN	Isoform 2 of Polyamine-modulated factor 1-binding protein 1 OS=Homo sapiens GN=PMFBP1	117493	1022	70.61	Q8TBY8-2	78	Yes	Yes	Yes	No	No	16q22.2	Evidence at transcript level	0		FUNCTION: May play a role in sperm morphology especially the sperm tail and consequently affect fertility. May also be involved in the general organization of cellular cytoskeleton. {ECO:0000269|PubMed:1770140}.	UE
Q8TBZ9	Yes	C7orf62	sp|Q8TBZ9|CG062_HUMAN	Uncharacterized protein C7orf62 OS=Homo sapiens GN=C7orf62 PE=2 SV=1	29482	253	47.43	Q8TBZ9	12	Yes	Yes	Yes	Yes	Yes	7q21.13	Evidence at transcript level	0			SET	Yes
Q8TD35	No	LKAAEAR1 C20orf201	sp|Q8TD35|LKAM1_HUMAN	Protein LKAAEAR1 OS=Homo sapiens GN=LKAAEAR1 PE=2 SV=3	21507	194	20.1	Q8TD35	2	Yes	No	No	No	No	20q13.33	Evidence at transcript level	0
Q8WTQ4	No	C16orf78	sp|Q8WTQ4|CP078_HUMAN	Uncharacterized protein C16orf78	30819	265	6.79	Q8WTQ4	2	Yes	No	No	No	No	16q12.1	Evidence at transcript level	0			SET	Yes
Q8WVZ1	No	ZDHHC19	sp|Q8WVZ1|ZDH19_HUMAN	Probable palmitoyltransferase ZDHHC19 OS=Homo sapiens GN=ZDHHC19 PE=2 SV=2	34352	309	6.8	Q8WVZ1	2	No	Yes	No	No	Yes	3q29	Evidence at transcript level	4	Membrane {ECO:0000305}; Multi-pass membrane protein {ECO:0000305}.		SET
Q8WVZ7	Yes	RNF133	sp|Q8WVZ7|RN133_HUMAN	E3 ubiquitin-protein ligase RNF133 OS=Homo sapiens GN=RNF133 PE=2 SV=1	42293	376	10.37	Q8WVZ7	3	No	No	No	No	Yes	7q31.32	Evidence at transcript level	1	Endoplasmic reticulum membrane {ECO:0000250}; Single-pass membrane protein {ECO:0000250}.	FUNCTION: Has E3 ubiquitin-protein ligase activity. {ECO:0000250}.	SET	Yes
Q8WW18	Yes	C17orf50	sp|Q8WW18|CQ050_HUMAN	Uncharacterized protein C17orf50 OS=Homo sapiens GN=C17orf50 PE=2 SV=2	19345	174	6.9	Q8WW18	1	No	No	Yes	No	No	17q12	Evidence at transcript level	0			IE	Yes
Q8WWF3	Yes	SSMEM1 C7orf45	sp|Q8WWF3|SSMM1_HUMAN	Serine-rich single-pass membrane protein 1 OS=Homo sapiens GN=SSMEM1 PE=2 SV=1	28167	244	27.87	Q8WWF3	6	Yes	Yes	Yes	No	No	7q32.2	Evidence at transcript level	1	Membrane {ECO:0000305}; Single-pass membrane protein {ECO:0000305}.		SET	Yes
Q8WXQ8	No	CPA5	sp|Q8WXQ8|CBPA5_HUMAN	Carboxypeptidase A5 OS=Homo sapiens GN=CPA5 PE=2 SV=1	49035	436	33.49	Q8WXQ8	10	Yes	Yes	Yes	Yes	Yes	7q32.2	Evidence at transcript level	0	Secreted {ECO:0000250}.		UE
Q96E66	No	LRTOMT LRRC51	sp|Q96E66|LRC51_HUMAN	Leucine-rich repeat-containing protein 51 OS=Homo sapiens GN=LRTOMT PE=2 SV=1	22206	192	59.38	Q96E66	12	Yes	No	Yes	Yes	Yes	11q13.4	Evidence at transcript level	0	Cytoplasm {ECO:0000250}.		UE
Q96KW9	Yes	SPACA7 C13orf28	sp|Q96KW9|SPAC7_HUMAN	Protein SPACA7 OS=Homo sapiens GN=SPACA7 PE=2 SV=2	21465	195	28.21	Q96KW9	3	Yes	Yes	No	Yes	No	13q34	Evidence at transcript level	0	Secreted {ECO:0000250|UniProtKB:Q9D2S4}. Cytoplasmic vesicle, secretory vesicle, acrosome {ECO:0000269|PubMed:22495889}. Cytoplasmic vesicle, secretory vesicle, acrosome lumen {ECO:0000250|UniProtKB:Q9D2S4}. Note=Localized in perinuclear pro-acrosomal granules in round spermatides. Localized between the inner and outer acrosomal membranes (matrix or lumen) in spermatozoa. Secreted during acrosome…	FUNCTION: Involved in fertilization. Seems not to play a direct role in sperm-egg binding or gamete fusion. {ECO:0000250|UniProtKB:Q9D2S4}.	SET	Yes
Q96L03	No	SPATA17	sp|Q96L03|SPT17_HUMAN	Spermatogenesis-associated protein 17 OS=Homo sapiens GN=SPATA17 PE=2 SV=1	43499	361	17.45	Q96L03	8	Yes	Yes	No	Yes	Yes	1q41	Evidence at transcript level	0	Cytoplasm {ECO:0000250}.		SET
Q96L15	No	ART5 UNQ575/PRO1137	sp|Q96L15|NAR5_HUMAN	Ecto-ADP-ribosyltransferase 5 OS=Homo sapiens GN=ART5 PE=2 SV=4	32053	291	16.84	Q96L15	4	Yes	No	No	Yes	Yes	11p15.4	Evidence at transcript level	0	Secreted {ECO:0000305}.
Q96LI9	Yes	CXorf58	sp|Q96LI9|CX058_HUMAN	Putative uncharacterized protein CXorf58 OS=Homo sapiens GN=CXorf58 PE=2 SV=2	38899	332	3.92	Q96LI9	1	No	No	No	No	Yes	Xp22.11	Evidence at transcript level	0			SET
Q96LM5	Yes	C4orf45	sp|Q96LM5|CD045_HUMAN	Uncharacterized protein C4orf45 OS=Homo sapiens GN=C4orf45 PE=2 SV=3	21722	186	29.57	Q96LM5	5	Yes	Yes	Yes	No	Yes	4q32.1	Evidence at transcript level	0			SET
Q96LU5	No	IMMP1L	sp|Q96LU5|IMP1L_HUMAN	Mitochondrial inner membrane protease subunit 1 OS=Homo sapiens GN=IMMP1L PE=2 SV=1	18504	166	24.7	Q96LU5	3	Yes	Yes	No	No	No	11p13	Evidence at transcript level	0	Mitochondrion inner membrane {ECO:0000305|PubMed:15814844}.	FUNCTION: Catalyzes the removal of transit peptides required for the targeting of proteins from the mitochondrial matrix, across the inner membrane, into the inter-membrane space. Known to process the nuclear encoded protein DIABLO. {ECO:0000269|PubMed:15814844}.	PET
Q96M20	Yes	CNBD2 C20orf152	sp|Q96M20|CNBD2_HUMAN	Cyclic nucleotide-binding domain-containing protein 2 OS=Homo sapiens GN=CNBD2 PE=2 SV=2	67512	576	14.41	Q96M20	6	No	Yes	No	No	Yes	20q11.23	Evidence at transcript level	0			SET
Q96M60	Yes	FAM227B C15orf33	sp|Q96M60|F227B_HUMAN	Protein FAM227B OS=Homo sapiens GN=FAM227B PE=2 SV=2	59955	508	2.56	Q96M60	1	No	No	No	Yes	No	15q21.2	Evidence at transcript level	0
Q96M69	Yes	LRGUK	sp|Q96M69|LRGUK_HUMAN	Leucine-rich repeat and guanylate kinase domain-containing protein OS=Homo sapiens GN=LRGUK PE=2 SV=1	93618	825	28.36	Q96M69	11	Yes	Yes	Yes	No	Yes	7q33	Evidence at transcript level	0	Cytoplasmic vesicle, secretory vesicle, acrosome {ECO:0000250|UniProtKB:Q9D5S7}. Note=Localizes to the acrosome-acroplaxome-manchette-tail axis. {ECO:0000250|UniProtKB:Q9D5S7}.	FUNCTION: Involved in multiple aspects of sperm assembly including acrosome attachment, shaping of the sperm head and in the early aspects of axoneme development. {ECO:0000250|UniProtKB:Q9D5S7}.	SET
Q96M83	No	CCDC7 BIOT2	sp|Q96M83|CCDC7_HUMAN	Coiled-coil domain-containing protein 7 OS=Homo sapiens GN=CCDC7 PE=2 SV=2	55779	486	19.34	Q96M83	7	Yes	Yes	Yes	Yes	Yes	10p11.22	Evidence at transcript level	0		FUNCTION: May play a role in tumorigenesis. {ECO:0000250}.	SET
Q96M86	No	DNHD1 C11orf47 CCDC35 DHCD1 DNHD1L UNQ5781/PRO12970	sp|Q96M86|DNHD1_HUMAN	Dynein heavy chain domain-containing protein 1 OS=Homo sapiens GN=DNHD1 PE=2 SV=2	533644	4753	3.85	Q96M86	13	No	No	Yes	No	Yes	11p15.4	Evidence at transcript level	0			PET
Q96N23	Yes	CFAP54 C12orf55 C12orf63	sp|Q96N23|CFA54_HUMAN	Cilia- and flagella-associated protein 54 OS=Homo sapiens GN=CFAP54 PE=2 SV=3	351969	3096	16.28	Q96N23	38	Yes	Yes	Yes	No	Yes	12q23.1	Evidence at transcript level	0	Cytoplasm, cytoskeleton, cilium axoneme {ECO:0000250|UniProtKB:A8J666}.	FUNCTION: Required for assembly and function of cilia and flagella. {ECO:0000250|UniProtKB:Q8C6S9}.
Q96PP4	Yes	TSGA13	sp|Q96PP4|TSG13_HUMAN	Testis-specific gene 13 protein OS=Homo sapiens GN=TSGA13 PE=2 SV=1	31777	275	21.45	Q96PP4	4	Yes	No	No	No	No	7q32.2	Evidence at transcript level	0			SET	Yes
Q96SF2	Yes	CCT8L2 CESK1	sp|Q96SF2|TCPQM_HUMAN	T-complex protein 1 subunit theta-like 2 OS=Homo sapiens GN=CCT8L2 PE=2 SV=2	59387	557	32.5	Q96SF2	5	Yes	Yes	Yes	Yes	Yes	22q11.1	Evidence at transcript level	0	Cytoplasm {ECO:0000250}.	FUNCTION: Possible molecular chaperone; assists the folding of proteins upon ATP hydrolysis. {ECO:0000250}.	SET	Yes
Q9BYW3	No	DEFB126 C20orf8 DEFB26	sp|Q9BYW3|DB126_HUMAN	Beta-defensin 126 OS=Homo sapiens GN=DEFB126 PE=2 SV=2	12174	111	35.14	Q9BYW3	5	Yes	Yes	No	No	No	20p13	Evidence at transcript level	0	Secreted.	FUNCTION: Has antibacterial activity. {ECO:0000305}.
Q9BZ19	Yes	ANKRD60 C20orf86	sp|Q9BZ19|ANR60_HUMAN	Ankyrin repeat domain-containing protein 60 OS=Homo sapiens GN=ANKRD60 PE=3 SV=3	37630	345	4.64	Q9BZ19	1	No	No	No	No	Yes	20q13.32	Inferred from homology	0
Q9BZJ4	No	SLC25A39 CGI-69 PRO2163	sp|Q9BZJ4|S2539_HUMAN	Solute carrier family 25 member 39 OS=Homo sapiens GN=SLC25A39 PE=2 SV=2	39248	359	9.75	Q9BZJ4	3	Yes	No	No	No	No	17q21.31	Evidence at transcript level	6	Mitochondrion inner membrane {ECO:0000269|PubMed:11139402, ECO:0000269|PubMed:11256614}; Multi-pass membrane protein {ECO:0000269|PubMed:11139402, ECO:0000269|PubMed:11256614}.	FUNCTION: Required for normal heme biosynthesis. {ECO:0000250}.
Q9GZN6	No	SLC6A16 NTT5	sp|Q9GZN6|S6A16_HUMAN	Orphan sodium- and chloride-dependent neurotransmitter transporter NTT5 OS=Homo sapiens GN=SLC6A16 PE=2 SV=1	82199	736	12.91	Q9GZN6	6	No	Yes	Yes	Yes	Yes	19q13.33	Evidence at transcript level	12	Membrane; Multi-pass membrane protein.		PET
Q9H1M3	No	DEFB129 C20orf87 DEFB29 UNQ5794/PRO19599	sp|Q9H1M3|DB129_HUMAN	Beta-defensin 129 OS=Homo sapiens GN=DEFB129 PE=2 SV=1	20298	183	22.95	Q9H1M3	3	Yes	Yes	Yes	Yes	Yes	20p13	Evidence at transcript level	0	Secreted {ECO:0000305}.	FUNCTION: Has antibacterial activity. {ECO:0000305}.
Q9H1P6	Yes	C20orf85	sp|Q9H1P6|CT085_HUMAN	Uncharacterized protein C20orf85 OS=Homo sapiens GN=C20orf85 PE=2 SV=1	15719	137	37.96	Q9H1P6	5	Yes	Yes	Yes	Yes	Yes	20q13.32	Evidence at transcript level	0			IE
Q9H1U9	No	SLC25A51 MCART1	sp|Q9H1U9|S2551_HUMAN	Solute carrier family 25 member 51 OS=Homo sapiens GN=SLC25A51 PE=2 SV=1	33672	297	15.49	Q9H1U9	1	No	No	No	Yes	No	9p13.1	Evidence at transcript level	6	Mitochondrion inner membrane {ECO:0000305}; Multi-pass membrane protein {ECO:0000305}.
Q9H3M9	Yes	ATXN3L ATX3L MJDL	sp|Q9H3M9|ATX3L_HUMAN	Putative ataxin-3-like protein OS=Homo sapiens GN=ATXN3L PE=5 SV=2	40747	355	30.42	Q9H3M9	7	Yes	Yes	Yes	No	Yes	Xp22.2	Uncertain	0	Nucleus {ECO:0000250}.	FUNCTION: Deubiquitinating enzyme that cleaves both 'Lys-48'-linked and 'Lys-63'-linked poly-ubiquitin chains (in vitro).	SET
Q9H3V2	Yes	MS4A5 CD20L2 TETM4	sp|Q9H3V2|MS4A5_HUMAN	Membrane-spanning 4-domains subfamily A member 5 OS=Homo sapiens GN=MS4A5 PE=2 SV=1	22283	200	5	Q9H3V2	1	No	Yes	Yes	No	Yes	11q12.2	Evidence at transcript level	4	Membrane; Multi-pass membrane protein.	FUNCTION: May be involved in signal transduction as a component of a multimeric receptor complex.	SET
Q9H3Z7	No	ABHD16B C20orf135	sp|Q9H3Z7|ABHGB_HUMAN	Abhydrolase domain-containing protein 16B OS=Homo sapiens GN=ABHD16B PE=3 SV=1	52554	469	6.61	Q9H3Z7	2	No	No	No	No	No	20q13.33	Inferred from homology	0
Q9H579-2	Yes	MROH8 C20orf131 C20orf132	sp|Q9H579-2|MROH8_HUMAN	Isoform 2 of Protein MROH8 OS=Homo sapiens GN=MROH8	99626	483	27.85	Q9H579-2	18	Yes	Yes	Yes	Yes	Yes	20q11.23	Evidence at transcript level	0			SET
Q9H5F2	Yes	C11orf1	sp|Q9H5F2|CK001_HUMAN	UPF0686 protein C11orf1 OS=Homo sapiens GN=C11orf1 PE=2 SV=1	17784	150	34	Q9H5F2	5	Yes	No	No	No	Yes	11q23.1	Evidence at transcript level	0	Nucleus {ECO:0000269|PubMed:10873569}.
Q9H693	Yes	C16orf95	sp|Q9H693|CP095_HUMAN	Uncharacterized protein C16orf95 OS=Homo sapiens GN=C16orf95 PE=2 SV=1	16793	158	10.13	Q9H693	1	Yes	Yes	No	No	Yes	16q24.2	Evidence at transcript level	0			IE
Q9H7T0	Yes	CATSPERB C14orf161	sp|Q9H7T0|CTSRB_HUMAN	Cation channel sperm-associated protein subunit beta OS=Homo sapiens GN=CATSPERB PE=2 SV=2	126923	1116	22.13	Q9H7T0	22	Yes	Yes	Yes	No	Yes	14q32.12	Evidence at transcript level	4	Membrane {ECO:0000250}; Multi-pass membrane protein {ECO:0000250}.	FUNCTION: Probably involved in sperm cell hyperactivation via its association with CATSPER1. Sperm cell hyperactivation is needed for sperm motility which is essential late in the preparation of sperm for fertilization (By similarity). {ECO:0000250}.	SET
Q9H8X9	No	ZDHHC11 ZNF399	sp|Q9H8X9|ZDH11_HUMAN	Probable palmitoyltransferase ZDHHC11 OS=Homo sapiens GN=ZDHHC11 PE=2 SV=1	45975	412	7.77	Q9H8X9	2	No	No	Yes	Yes	No	5p15.33	Evidence at transcript level	4	Membrane {ECO:0000305}; Multi-pass membrane protein {ECO:0000305}.		UE
Q9H943	No	C10orf68	sp|Q9H943|CJ068_HUMAN	Uncharacterized protein C10orf68 OS=Homo sapiens GN=C10orf68 PE=2 SV=2	71535	628	2.55	Q9H943	1	No	No	No	Yes	No	10p11.22	Evidence at transcript level	0			UE
Q9NUD7	Yes	C20orf96	sp|Q9NUD7|CT096_HUMAN	Uncharacterized protein C20orf96 OS=Homo sapiens GN=C20orf96 PE=2 SV=2	42859	363	2.75	Q9NUD7	1	No	No	No	No	Yes	20p13	Evidence at transcript level	0			PET
Q9NZM6	No	PKD2L2	sp|Q9NZM6|PK2L2_HUMAN	Polycystic kidney disease 2-like 2 protein OS=Homo sapiens GN=PKD2L2 PE=2 SV=2	73790	624	4.49	Q9NZM6	2	No	No	No	No	Yes	5q31.2	Evidence at transcript level	6	Membrane {ECO:0000305}; Multi-pass membrane protein {ECO:0000305}.	FUNCTION: May function as a subunit of a cation channel and play a role in fertilization.
Q9P1V8	Yes	SAMD15 C14orf174 FAM15A	sp|Q9P1V8|SAM15_HUMAN	Sterile alpha motif domain-containing protein 15 OS=Homo sapiens GN=SAMD15 PE=2 SV=1	77150	674	38.72	Q9P1V8	19	Yes	No	No	Yes	Yes	14q24.3	Evidence at transcript level	0			SET
Q9P1Z9-2	No	CCDC180 C9orf174 KIAA1529	sp|Q9P1Z9-2|CC180_HUMAN	Isoform 2 of Coiled-coil domain-containing protein 180 OS=Homo sapiens GN=CCDC180	197344	1646	16.34	Q9P1Z9-2	22	Yes	Yes	Yes	No	Yes	9q22.33	Evidence at transcript level	1	Membrane {ECO:0000305}; Single-pass membrane protein {ECO:0000305}.
Q9P2S6	No	ANKMY1 TSAL1 ZMYND13	sp|Q9P2S6|ANKY1_HUMAN	Ankyrin repeat and MYND domain-containing protein 1 OS=Homo sapiens GN=ANKMY1 PE=2 SV=2	105515	941	25.19	Q9P2S6	19	Yes	Yes	Yes	No	Yes	2q37.3	Evidence at transcript level	0			PET
Q9UKJ8	Yes	ADAM21	sp|Q9UKJ8|ADA21_HUMAN	Disintegrin and metalloproteinase domain-containing protein 21 OS=Homo sapiens GN=ADAM21 PE=2 SV=2	80833	722	4.71	Q9UKJ8	3	No	No	Yes	Yes	Yes	14q24.2	Evidence at transcript level	1	Membrane; Single-pass type I membrane protein.	FUNCTION: May be involved in sperm maturation and/or fertilization. May also be involved in epithelia functions associated with establishing and maintaining gradients of ions or nutrients.	SET
Q9ULG3	No	KIAA1257	sp|Q9ULG3|K1257_HUMAN	Uncharacterized protein KIAA1257 OS=Homo sapiens GN=KIAA1257 PE=2 SV=2	46740	409	3.18	Q9ULG3	1	No	No	No	No	Yes	3q21.3	Evidence at transcript level	0			SET
Q9Y238	No	DLEC1 DLC1	sp|Q9Y238|DLEC1_HUMAN	Deleted in lung and esophageal cancer protein 1 OS=Homo sapiens GN=DLEC1 PE=2 SV=2	195684	1755	16.92	Q9Y238	22	Yes	Yes	Yes	No	Yes	3p22.2	Evidence at transcript level	0	Cytoplasm {ECO:0000269|PubMed:10213508}.	FUNCTION: May act as a tumor suppressor by inhibiting cell proliferation. {ECO:0000269|PubMed:10213508}.
Q9Y581	Yes	INSL6 RIF1	sp|Q9Y581|INSL6_HUMAN	Insulin-like peptide INSL6 OS=Homo sapiens GN=INSL6 PE=2 SV=2	24859	213	12.68	Q9Y581	2	Yes	No	No	No	Yes	9p24.1	Evidence at transcript level	0	Secreted {ECO:0000250}.	FUNCTION: May have a role in sperm development and fertilization.	SET
W5XKT8	No	SPACA6 SPACA6P UNQ2487/PRO5774	sp|W5XKT8|SACA6_HUMAN	Sperm acrosome membrane-associated protein 6 OS=Homo sapiens GN=SPACA6P PE=2 SV=2	36333	324	8.33	W5XKT8	2	No	No	Yes	Yes	No	19q13.41	Evidence at transcript level	1	Membrane {ECO:0000255}; Single-pass type I membrane protein {ECO:0000255}.	FUNCTION: Sperm protein potentially involved sperm-egg fusion. {ECO:0000250|UniProtKB:E9Q8Q8}.
